# Supplementary material for: Optimization of Imputation Strategies for High-Resolution Gas Chromatography-Mass Spectrometry (HR GC-MS) Metabolomics Data
Source: Preprints.org preprint supplement (doi:10.20944/preprints202204.0106.v1), 2022-04-12
Supplement: Supplementary file 3 [file supplementary]

## Sheet: Nist plasma_QC
Metabolite	CV%
Neg_Shikimic_acid	5.69955
1_3_Diaminopropane	4.65189
1_3_dihydroxypyridine	4.80744
1_5_Anhydro_D_glucitol	5.32036
1_5_anhydroglucitol	0.908988
1_6_Anhydro_beta_D_Glucose	1.40123
107941_cholesterol_offRI	16.2452
16_Hydroxyhexadecanoic_acid	1.32446
1_Aminocyclopropane_1_carboxylic_acid	16.4949
1_Kestose	6.96862
1_Methyladenosine	10.5791
1_methylgalactose	11.0694
1_Methylhistamine	8.54439
1_methylhydantoin	3.14651
1_monoolein	7.02164
1_monopalmitin	6.35218
2_1_methyl_2_pyrrolidinyl_pyridine	1.59782
2_3_Bisphospho_glyceric_acid	4.12905
2_5_Dihydroxybenzoate	7.67959
2_5_dihydroxypyrazine_	7.19711
2_Aminobutyric_acid	3.22802
2_Aminoethanol	2.94207
2_Coumaric_acid	2.9596
2_Deoxyadenosine	2.45574
2_Deoxy_D_Glucose	3.8801
2_deoxyguanosine	6.16822
2_deoxytetronic_acid	1.68589
2_Deoxyuridine	11.2946
2_hydroxyglutaric_acid	5.82389
2_hydroxypyrazinyl_2_propenoic_acid_ethyl_ester_	3.58963
2_ketoadipic_acid_	4.73589
2_ketoisocaproic_acid	19.5175
2_methylglutaric_acid	1.90039
2_methylglyceric_acid_	2.78984
2_Methylpropanal	0.764459
2_Oxoglutarate	3.18396
2_Picolinate	9.99975
3_4_Dihydroxyphenylacetate	1.16032
3_4_Dihydroxyphenylglycol	1.65469
3_Dehydroshikimate	0.646944
3_deoxyhexitol_	2.83706
3_Hydroxy_3_methylglutarate_CoA	1.69044
3_hydroxy_3_methylglutaric_acid	1.69044
3_Hydroxybenzoate	4.23456
3_Hydroxybenzylalcohol	3.4538
3_Hydroxyisovaleric_acid	2.433
3_Hydroxymethylglutaryl_CoA	1.86252
3_Hydroxypyruvic_acid	10.3511
3_Indoleacetonitrile	1.73813
3_Methoxytyramine	1.25919
3_Methoxytyrosine	3.25807
3_Nitro_L_Tyrosine	5.54839
4_aminobutyric_acid_	5.08956
4_Coumarate	1.52445
4_Hydroxybenzoate	6.03095
4_hydroxybutyric_acid	1.67103
4_Hydroxyphenylpyruvic_acid	8.79936
4_Hydroxypyridine	0.970719
4_Methylumbelliferone	2.41633
5_Aminolevulinic_acid	1.41949
5_Aminopentanoic_acid	0.629612
5_Aminovaleric_acid	3.11643
5_Dehydroquinic_acid	6.80949
5_Hydroxyanthranillic_acid	1.86206
5_Hydroxylysine	10.9555
5_Hydroxytryptophan	6.85191
6_Aminohexanoic_acid	4.35824
6_Carboxyhexanoate_Pimelic_acid	1.74975
6_Hydroxydopamine	3.43937
acetaminophen	8.34338
aconitic_acid	10.4969
Adenine	7.16069
Adipate	1.80719
adrenaline	3.92555
Agmatine_Sulfate	0.633204
Alanine	2.73856
Allantoin	5.06484
Allose	1.01854
Allothreonine	2.22042
alpha_tocopherol	3.76575
alpha_aminoadipic_acid	6.18463
Alpha_D_Glucose	9.03054
alpha_Lactose	1.25803
alpha_tocopherol_	1.78092
Amantadine	14.4903
Aminoadipate	3.85095
Anthranilic_acid	8.60194
Arabinose	6.06149
Arabitol	0.307167
arachidonic_acid	2.94359
Asparagine	6.13415
aspartic_acid	6.48874
Azelate	2.84358
Benzoate	4.72168
beta_alanine	3.92307
beta_gentiobiose	18.4901
Beta_Glycerophosphate	5.7997
Betaine	5.05729
beta_Ketoadipic_acid	4.59901
beta_mannosylglycerate	1.33321
beta_sitosterol	1.87472
Biopterin	6.01178
biuret	5.33548
Cadaverine	0.685345
Caffeine	14.1856
capric_acid	1.96703
Cellobiose	4.39625
cerotinic_acid	3.47915
chenodeoxycholic_acid	1.45978
cholesterol	6.30187
cholesterone	1.68007
cholic_acid	0.925512
Cinnamyl_alcohol	1.9739
Citramalate	5.43302
Citric_acid	7.6367
Citrulline	1.78955
conduritol_beta_expoxide	2.85065
Creatinine	2.72002
Cyclopentanone	1.64034
Cysteamine	2.65036
Cysteine	4.09757
Cystine	2.27723
Cytidine_monophosphate	2.35779
D_Neg_Penicillamine	14.0317
D_Neg_Ribose	1.12752
D_Pos_Allose	1.58473
D_Pos_Galactosamine	4.6185
D_Pos_Galactose	4.6186
D_Pos_Galacturonic_acid	1.43149
D_Pos_Glucosamine	6.7551
D_Pos_Glucose	4.80183
D_Pos_Mannose	4.82616
D_L_alpha_epsilon_Diaminopimelic_acid	2.44889
D_3_Phenyllactic_acid	5.10903
d3_tryptophan	3.69385
d6_cholesterol	3.91683
D_Alanine	1.95977
D_Arabinose_5_phosphate	6.92398
Dehydroisoandrosterone_3_sulfate	4.87556
deoxycholic_acid	0.9226
Deoxycytidine	5.82846
Deoxyguanosine	0.982718
Deoxyribose	5.14259
D_Glucose_6_phosphate	29.4761
D_Glutamine	4.19806
D_homoserine	3.00079
Diaminopimelate	9.33981
Diethanolamine	1.11058
dihydrocholesterol	4.27999
Dihydrouracil	3.73846
dithiothreitol	3.83649
DL_2_3_Diaminopropionic_acid	2.44637
DL_3_4_Dihydroxymandelic_acid	5.66048
DL_beta_Hydroxybutyric_acid	0.859583
DL_Homocysteine	3.84054
DL_Isocitric_acid	6.8542
DL_Malic_acid	1.48663
DL_Norvaline	6.24787
DL_threo_beta_Methylaspartic_acid	2.50309
docosahexaenoic_acid	3.05661
Dopamine	8.11294
D_Ornithine	1.6973
D_Ribose_5_phosphate	2.76637
D_Ribulose_1_5_diphosphate	3.39344
D_Sorbitol_6_phosphate	1.86476
D_Threitol	5.58307
D_Xylulose	5.52907
Elaidic_acid	6.88316
epicatechin	2.79726
epsilon_caprolactam	2.19066
Erythritol	2.08524
Estradiol_17_Alpha	1.99875
ethanol_phosphate	5.10181
ethanolamine	10.224
Ethyl_3_Ureidopropionate	7.26614
Ethylmalonate	1.86791
Ethylmalonic_acid	9.79189
Ferulic_acid	2.34391
formononetin	14.0153
Fructose	10.4868
Fructose_bisphosphate	1.23017
Fructose_6_phosphate	2.79435
Fumarate	1.1772
Fusaric_acid	2.30424
GABA	4.7321
Galactarate	1.13821
Galactitol	0.935665
galactonic_acid	3.43048
galactose	3.19317
Galacturnonate	0.587227
Gallic_acid	1.80092
gallocatechin	12.1674
gamma_Linolenic_acid	1.04201
Gentisic_acid	5.2494
Gentistic_acid	1.23081
Gluconate	1.11253
gluconic_acid_lactone	3.41619
Gluconolactone	5.93514
glucose	1.94326
Glucose_1_phosphate	7.70512
Glucose_6_phosphate	7.53448
glutamic_acid	5.01593
Glutamine	1.19845
Glutarate	9.48278
Glutarylcarnitine	3.1948
Glyceraldehyde_3_phosphate	5.06785
Glycerate	3.0304
Glyceric_acid	10.2343
Glycerol	1.00813
Glycerol_2_phosphate	1.2275
glycerol_3_galactoside	2.06596
Glycerol_3_phosphate	5.78779
glycerol_alpha_phosphate	4.17205
Glycine	1.38994
Glycolic_acid	7.34107
Gly_Gly	2.25615
Guanidinoacetate	6.50533
guanidinosuccinate	4.9309
Harmaline	0.770963
hexadecylglycerol	1.85178
hexoside	2.78586
hexuronic_acid	1.15763
Homocysteine	10.6962
Homogenentisic_acid	0.91166
homoglutamine	4.30647
Homoserine	6.5622
Homovanillate	6.46394
hydroxycarbamate	12.2721
Hydroxyphenyllactate	1.43206
Hypotaurine	0.924693
Hypoxanthine	2.84488
ibuprofen	1.90581
Indole_3_Acetaldehyde	14.7035
Indole_3_acetate	0.909109
Indole_3_carboxyaldehyde	5.16608
indole_3_lactate	5.63319
Indoleacetic_acid	4.04984
inosine	3.31373
Isocitrate	1.02072
isohexonic_acid	12.3932
Isoleucine	2.58082
isopentadecanoic_acid	9.05713
isothreonic_acid	2.55388
Kaempferol	5.18789
Ketoisoleucine	1.71434
Ketoleucine	0.81757
Ketovaline	2.09955
kynurenine_	2.28964
L_Neg_Mandelic_acid	2.19178
L_Neg_Phenylalanine	1.9442
L_Neg_Proline	4.35419
L_Pos_Arginine	4.87293
L_Pos_Lysine	1.60575
L_2_Aminobutyric_acid	14.5594
L_5_Oxoproline	3.38124
Lactose	9.05672
L_Alanine	3.41293
L_Ascorbic_acid	2.12515
L_Asparagine	16.2936
lauric_acid	3.39799
Lauroylcarnitine	6.55615
L_Cysteine	3.94512
L_DOPA_	2.27723
Leucine	2.05926
L_Glutamine	13.3232
L_Gulcono_1_4_lactone	3.4453
L_Gulonolactone	1.02753
L_Iditol	3.63969
Linoleic_acid	1.46453
Linolenic_acid	2.33639
L_Isoleucine	3.88568
lithocholic_acid	8.97654
L_Leucine	2.06436
L_Methionine_sulfone	4.1992
L_Norvaline	2.78326
L_Ornithine	1.68687
L_Prolinamide	0.369226
L_Rhamnose	3.35273
L_Serine	2.14055
L_Valine	4.34623
Lysine	1.37324
Malate	3.34219
Maleamic_acid	9.25239
malic_acid	2.87489
Malonate	1.2004
Malonic_acid	9.04995
Maltose	1.80731
Maltotriose	6.41368
Mandelate	5.2689
mannonic_acid	5.10588
Melibiose	2.60146
Menaquinone	3.36698
Mesaconic_acid	2.84626
meso_Erythritol	3.09025
Meso_tartarate	3.92231
methanolphosphate	13.7127
metharbital	2.50312
methionine	1.59949
methionine_sulfoxide	1.25004
Methyl_galactoside	6.21785
Methyl_4_aminobutyrate	3.03742
Methylglutarate	3.70123
methylhexose_nist	4.98116
Methylmalonate	0.847129
Methylmalonic_acid	7.80827
methyltetrahydrophenanthrenone	6.26533
Methylthioadenosine	1.9926
Mevalonate	6.21296
Myoinositol	5.84
Myricetin	4.47022
Myristic_acid	1.60142
N_N_Dimethylarginine	3.1538
N_Acetylaspartate	9.97836
N_Acetyl_D_glucosamine	2.66413
N_Acetyl_D_glucosamine_6_phosphate	4.82726
N_Acetyl_DL_Valine	2.85217
N_acetyl_D_mannosamine	3.73524
N_acetylgalactosamine	1.64617
n_acetylglutamate	3.03244
N_Acetylleucine	2.10914
N_Acetyl_L_glutamine	3.63683
N_Acetylmethionine	2.99887
N_Acetylneuraminic_acid	25.3816
N_acetylornithine	3.37092
N_Acetylputrescine	2.77896
N_Acetylserine	2.99131
N_alpha_Acetyl_L_Lysine	1.74056
N_alpha_Acetyl_L_ornithine	2.07002
N_Alpha_AcetylLysine	5.65871
N_carbamoylaspartate_	0.751058
N_Carbamoyl_L_Aspartic_acid	8.63982
N_Formyl_L_Methionine	4.60901
Niacinamide	3.0062
Nicotinamide	4.63384
Nicotinic_acid	7.65849
N_Methylaspartate	5.01017
N_Methyl_DL_Alanine	9.00048
N_Methylglutamate	0.788565
Nonadecanoic_acid	3.78746
Noradrenaline	3.19662
Norleucine	1.99181
Normetanephrine	1.0207
Norvaline	2.26622
O_Acetylserine	1.42679
octadecylglycerol	3.27903
Octanoic_acid	17.0212
oleamide_	8.22875
oleic_acid	3.01018
O_Phospho_serine	1.08162
ornithine	1.69695
Orotate	24.0836
o_Toluic_acid	3.54649
oxamic_acid	0.964726
Oxamide	1.80131
Oxoadipate	4.16501
Oxoproline	6.04803
palmitic_acid	1.44349
palmitoleic_acid	0.910794
pelargonic_acid	3.32844
Pentachlorophenol	24.3746
pentono_1_4_lactone	2.63616
Phenanthrene	6.19714
Phenylalanine	3.43953
Phenylpyruvic_acid	2.53272
phosphate	4.6867
phosphoenolpyruvate	3.64501
Phosphonoacetate	7.02396
Phosphoric_acid	3.23399
Phosphorylcholine	0.76472
Phosphoserine	1.44624
p_hydroxylphenyllactic_acid	4.82352
P_Hydroxyphenylacetic_acid	2.91657
phytol	0.78821
piceatannol	11.8802
Podophyllotoxin	5.20108
Proline	4.37185
pseudo_uridine	1.64034
Psicose	2.43596
Purine	3.58963
Putrescine	5.46588
Pylloquinone	3.03029
Pyridoxamine	2.72572
Pyridoxine	2.1568
Pyrocatechol	0.884998
Pyroglutamate	3.59287
pyrophosphate	12.9612
Pyrophosphoric_acid	1.44624
pyrrole_2_carboxylic_acid	17.0951
Quinolinate	15.5508
R_Neg_1_Amino_2_propanol	4.10431
rac_Glycerol_3_phosphoate	8.32856
Raffinose	22.9557
resveratrol	10.6077
Rhamnose	3.20082
Ribitol	0
ribonic_acid	1.2038
ribose	3.88202
ribose_5_phosphate	2.79435
ribulose_5_phosphate	1.97295
Saccharate	1.15763
Sakuranetin	3.99869
Salicyl_alcohol_beta_glucoside	8.69118
salicylaldehyde	2.36349
salicylic_acid	6.03095
Salsolinol	2.26214
Sarcosine	17.9369
Sebacic_acid	1.70865
Selenocystamine	1.08054
Selenomethionine	1.51063
serine	4.34739
Serotonin	7.92797
shikimic_acid	5.35822
Sinapic_acid	#DIV/0!
Sinigrin	2.12643
Sorbate	0.60374
Sorbitol	6.49063
Sorbose	0.986866
Spermidine	2.13194
Spermine	2.46579
stearic_acid	1.20434
stigmasterol	2.1415
Succinic_acid	2.97694
Tagatose	6.6575
Tartarate	2.22647
tetracosane	1.56308
Theophylline	3.21253
threonine	9.22835
threose	5.313
Thymidine	2.84136
Thymidine_monophosphate	1.85676
tocopherol_acetate	0.963773
trans_4_hydroxyproline	6.52947
Trans_Aconitate	1.88765
Trehalose	3.49562
Tryptamine	4.95428
Tryptophan	1.44821
Tyramine	0.770971
Tyrosine	1.21976
UDP_GlcNAc	1.31851
UDP_glucuronic_acid	1.77628
UDP_N_acetylglucosamine	1.41521
Undecylic_acid	3.01725
urea	3.018
Ureidopropionate	6.48874
Uric_Acid	1.24752
Uridine	3.19067
Uridine_5_diphospho_N_acetylglucosamine	5.2097
valine	10.5318
vanillic_acid	8.89714
Xylitol	0.0305426
xylonolactone	4.4182
z_hexose_pertms	9.03795
z_phthalate	2.49301
zymosterol	4.34453

## Sheet: Baboon plasma_QC
Metabolite	CV%
glycerol-1-phosphate	11.8808
(-)-Epigallo catechin	20.0133
(-)-Shikimic acid	14.2143
1,2-anhydro-myo-inositol	10.3847
1,3-Diaminopropane	18.4164
1,3-dihydroxypyridine	1.68884
1,5-Anhydro-D-glucitol	13.1396
1,5-anhydroglucitol	9.19664
1,6-Anhydro-beta-D-glucose	3.6664
1-Aminocyclopropane-1-carboxylic acid	11.3693
1-Kestose	16.0845
1-Methyl Histidine	2.2546
1-Methyladenosine	11.7902
1-methylgalactose	16.4744
1-Methylhistamine	7.58176
1-methylhydantoin	18.6287
1-monoolein	21.4972
2-(1-methyl-2-pyrrolidinyl)-pyridine	3.58604
2,3-Diaminopropionate	17.495
2,4-diaminobutyric acid	18.6272
2,4-dichloro-1-(2-chloroethenyl)-benzene	8.78991
2,5-Dihydroxybenzoate	9.47355
2,5-dihydroxypyrazine	14.8325
2-Aminoethanol	18.052
2-Aminoisobutyric acid; GC-EI-TOF; MS; n TMS; RT	8.0944
2-Coumaric acid	10.4836
2'-Deoxyadenosine	2.67264
2-Deoxy-D-Glucose	9.84361
2-deoxyerythritol	1.8791
2-hydroxyadipic acid	10.806
2-hydroxyglutaric acid	8.15518
2-hydroxypyrazinyl-2-propenoic acid ethyl ester	4.63672
2-isopropylmalic acid	10.2635
2-Methylglutaric acid	5.34275
2-methylglyceric acid	8.10051
2-Methylpropanal	11.0393
2-Oxoglutarate	23.27
2-Phosphoglycerate	9.54615
2-picolinic acid	8.6735
3,4-Dihydroxymandelic acid	8.85459
3',5'-Cyclic AMP	14.6249
3-aminoisobutyric acid	6.99326
3-Dehydroshikimate	9.78067
3-Hydroxyanthranilic acid	12.344
3-Hydroxybenzylalcohol	6.68752
3-Hydroxyisovaleric acid	6.60123
3-Hydroxymethylglutaryl CoA	5.70056
3-Hydroxyphenylacetate	5.72873
3-Methoxytyramine	10.1779
3-Methoxytyrosine	11.4621
3-Methylglutaric acid	13.0682
3-Nitro-L-Tyrosine	26.481
3-Phenylpropionic acid	7.56351
3-phosphoglycerate	12.0399
4-Hydroxybenzoate	10.2978
4-Hydroxybenzyl alcohol	8.47855
4-HydroxyMandelic acid	6.46379
4-Hydroxyphenethyl alcohol	7.22494
4-Hydroxyphenethyl alcohol	2.67224
4-hydroxyphenylacetic acid	7.29011
4-Hydroxypyridine	19.8751
5-Aminolevulinate	20.2383
5-Aminopentanoic acid	6.52312
5-Aminovaleric acid	21.6581
5-Dehydroquinic acid	10.7997
5-Hydroxyindoleacetate	8.59503
5-Hydroxyindoleacetic acid	4.33828
5-Hydroxylysine	19.0963
5-Hydroxytryptophan	5.96561
6-Amino-1-MethylUracil	21.1261
6-Aminohexanoic acid	18.331
6-Carboxyhexanoate_Pimelic acid	4.83745
6-deoxyglucitol	11.056
6-Hydroxydopamine	18.0124
acetaminophen	11.6931
aconitic acid	14.4204
Adenosine	19.6865
Adipate	6.19157
Agmatine Sulfate	19.6514
Alanylalanine	19.6197
Allantoin	8.89464
Allothreonine	26.2225
alloxanoic acid	17.1279
alpha-aminoadipic acid	4.68554
alpha-ketoglutarate	12.1031
alpha-Lactose	14.3184
alpha-Methylserine	9.67605
Amantadine	12.0758
aminomalonate	20.1215
Anthranilic acid	5.92984
Arabitol	9.82752
arachidonic acid	9.34345
ascorbic acid	14.521
asparagine	9.57872
aspartic acid	19.9195
Azelate	7.18381
Benzoate	14.1674
beta alanine	13.1361
beta-Cyano-L-Alanine	4.82786
beta-hydroxymyristic acid	4.36799
Betaine	23.8644
beta-Ketoadipic acid	6.26776
Bicine	12.5188
biphenyl	4.44992
Cadaverine	20.2302
Caffeine	2.97329
capric acid	4.56001
caprylic acid	3.61494
Cellobiose	15.1619
cerotinic aci	13.245
chenodeoxycholic acid	6.58713
cholesterol	14.9568
cholic acid	32.1898
Ciliatine	11.0243
cis-gondoic acid	17.7336
Citramalate	5.35775
citric acid	12.8317
Citric acid	4.31507
Citrulline	6.01019
conduritol-beta-epoxide	10.6167
Creatinine	15.2871
cyano-l-alanine	7.89481
Cyclopentanone	12.0559
Cysteamine	6.7319
Cysteine	6.34597
Cystine	23.0501
Cytidine monophosphate	8.35262
cytidine-5-monophosphate	14.904
D-(-)-Mannitol	15.2976
D-(-)-Penicillamine	8.37159
D-(-)-Ribose	7.4587
D-(+)-Fucose	15.9713
D-(+)-Galactose	11.9946
D-(+)-Maltose	14.3182
D-(+)-Mannose	8.07642
D-(+)-Pantothenic acid	19.3708
D-(+)-Trehalose	17.1857
D-(+)-Xylose	16.0349
D,L-alpha,epsilon-Diaminopimelic acid	20.3971
D-3-Phenyllactic acid	13.4542
d7-glucose	8.5765
D-Alanine	4.131
D-Arabinose 5-phosphate	12.7643
Dehydroisoandrosterone-3-sulfate	5.93858
deoxycholic acid	18.8827
Deoxycytidine	2.3881
Deoxyguanosine	15.3659
Deoxyribose	35.0376
Dethiobiotin	7.04312
D-Fructose 6-phosphate	4.04061
D-Glucose 6-phosphate	13.889
D-homoserine	13.3339
Diethanolamine	7.40649
dihydrocholesterol	17.3265
Dihydrouracil	15.4558
DL-2,3-Diaminopropionic acid	25.6373
DL-beta-Hydroxybutyric acid	14.4657
DL-Homocystine	20.6102
DL-Norvaline	15.2636
DL-Pyroglutamic acid	12.049
DL-threo-beta-Methylaspartic acid	5.64389
D-Lyxose	7.76104
docosahexaenoic acid	9.22325
dodecanoic acid	5.08302
dodecanol	7.74293
DOPA	9.1158
D-Ornithine	6.95884
D-Ribose 5-phosphate	21.7834
D-Ribulose 1,5-diphosphate	17.622
D-Ribulose	6.03217
D-Ribulose-5-phosphate	8.00836
D-Sorbitol 6-phosphate	16.4409
D-Threitol	20.8397
Elaidic acid	15.4185
epigallocatechin	15.2149
epsilon-caprolactam	10.8312
erythritol	14.4822
Erythritol	6.93875
erythronic acid lactone	3.44022
Estradiol-17-Alpha	12.7527
Ethanolamine	4.04388
Ethyl-3-Ureidopropionate	20.9031
Ethylmalonate	10.4259
formononetin	9.63876
Fructose bisphosphate	11.7174
fructose-1-phosphate	9.84543
Fructose-6-phosphate	12.4151
Fucose	10.0368
Fumarate	6.47967
GABA	11.3824
Galactarate	16.0077
Galactitol	8.29034
galactose-6-phosphate	14.7194
Galacturnonate	5.91171
Gallic acid	6.67411
gallocatechin	22.5391
gamma-Linolenic acid	3.92921
Gentisic acid	6.53999
glucoheptulose	14.8791
Gluconate	7.36072
gluconic acid lactone	11.8085
Gluconolactone_Rt_10.684_Mass 147.0657	9.51807
Glucosaminate	6.72759
glucose	6.9883
glucose-1-phosphate	5.94706
Glucose-1-phosphate	10.0813
glucose-6-phosphate	11.9881
Glucose-6-phosphate	9.17082
Glucuronate	13.633
glutamic acid	9.79979
Glutamine	7.15855
Glutarate	17.9298
Glutarylcarnitine	12.5364
Glyceraldehyde-3-phosphate	16.6719
glyceric acid	16.3293
Glycerol-3-phosphate	16.4198
glycerol-alpha-phosphate	10.0682
Glycine	5.01953
glycocyamine	19.7384
glycyl-proline	7.62965
Guanidinoacetate	11.4505
Harmaline	9.74119
heptadecanoic acid	14.4631
Heptadecanoic acid	13.5846
hexadecylglycerol	10.7414
hippuric acid	15.5462
histidine	18.8636
homoglutamine	34.7346
homoserine	2.08968
homoserine	10.2936
Homoserine	14.144
Homovanillate	10.4287
homovanillic acid	4.50478
hydrocinnamic acid	10.1215
HydroxyButyric acid	9.66291
HydroxyButyric acid	14.1439
Hydroxyphenyllactate	19.5505
hypoxanthine	5.11446
Ibuprofen	12.0678
Indole-3-acetaldehyde	6.76409
indole-3-acetate	13.012
Indoleacetic acid	6.14222
inosine	9.27935
inosine-5'-monophosphate	8.16938
Inositol	15.2911
Isocitrate	12.6769
isocitric acid	2.7813
isoheptadecanoic acid	20.6924
isohexonic acid	3.9862
Isoleucine	8.14202
Isonicotinic acid	8.28115
isopentadecanoic acid	36.7262
Isopentenyladenosine	12.2742
isoribose	16.0159
isothreitol	5.73578
isothreonic acid	16.8109
Ketoisoleucine	6.60132
kynurenine	7.61817
L-(-)-Malic acid	3.14103
L-(-)-Phenylalanine	19.4051
L-(-)-Proline	10.1059
L-(+)-Arginine	11.7769
L-(+)-Lysine	15.277
L-(+)-Tartaric acid	6.68652
L-5-Oxoproline	24.5732
Lactose	15.6381
L-Ascorbic acid	11.3742
L-Asparagine	12.7877
L-Aspartic acid	7.33755
Lauric acid	4.16549
Lauroylcarnitine	12.2495
L-Cysteine	19.7673
L-DOPA	23.0495
leucine	11.7942
Leucine	3.06189
leucrose	24.2335
levoglucosan	14.1416
L-Glutamine	3.21742
L-Gulonolactone	10.7301
L-Iditol	14.8113
linoleic acid	9.29735
Linoleic acid	4.92361
linolenic acid	5.56035
Linolenic acid	2.70155
L-Isoleucine	9.32652
lithocholic acid	15.0748
L-Leucine	16.9804
L-Norleucine	15.0867
L-Prolinamide	20.7086
L-Rhamnose	7.19597
L-Serine	3.72953
L-Theanine	5.81902
L-Valine	7.01106
lysine	19.1747
Lysine	6.50564
Malate	9.11465
Maleamic acid	30.7062
Malonate	12.9808
Malonic acid	8.63789
Maltose	13.191
Maltose	12.0013
Maltotriose	4.03242
Maltotriose	14.4083
Mandelate	3.68585
mannose-6-phosphate	6.89262
Melibiose	9.68241
Melibiose	10.94
Menaquinone	20.2223
Mesaconic acid	9.19428
meso-Erythritol	9.0076
Meso-tartarate	23.4918
methionine	8.62207
methionine sulfoxide	16.9009
Methionine sulfoximine	16.8799
Methyl jasmonate	13.8284
Methyl jasmonic acid	4.19598
Methyl-4-aminobutyrate	19.5814
Methylglutarate	10.429
methylhexose nist	12.2676
methylmaleic acid	14.2564
Methylmalonate	16.8926
Methylmalonic acid	20.2641
methyltetrahydrophenanthrenone1	14.5674
Mevalonate	6.17638
Myo-Inositol	15.2783
Myoinositol	10.6147
Myricetin	10.8795
Myristic acid methyl ester	2.87947
N,N-Dimethylarginine	13.056
N-Acetyl glutamine	8.12836
N-acetyl-5-hydroxytryptamine	16.8884
N-Acetylaspartate	6.76314
N-Acetyl-D-glucosamine	7.19623
N-Acetyl-DL-alanine	13.6009
N-Acetyl-DL-serine	9.2366
N-Acetyl-DL-Valine	16.0854
N-acetyl-D-mannosamine minor1	24.3244
N-acetylgalactosamine	14.5582
N-Acetylglutamate	13.2439
N-Acetylleucine	4.85585
N-Acetyl-L-glutamine	10.0579
N-acetylornithine	16.1081
N-Acetylputrescine	9.68453
N-Acetylputrescine	20.3937
N-Acetylserine	8.3429
N-alpha-Acetyl-L-Lysine	15.3105
N-alpha-Acetyl-L-ornithine	7.70199
N-Alpha-AcetylLysine	15.8964
n-Butylamine	4.58063
N-Carbamoyl-L-Aspartic acid	14.7695
N-FormylGlycine	3.75937
N-Formyl-L-Methionine	19.0329
Niacinamide	9.63187
nicotianamine	7.65552
Nicotinamide	12.7612
N-Methylaspartate	9.79975
Nonadecanoic acid methyl ester	5.98583
Noradrenaline	18.2937
Norleucine	8.54043
Normetanephrine	16.463
norvaline	31.1376
Norvaline	7.01107
O-Acetylserine	3.92777
octadecanol	4.60754
Octanoic acid	15.7789
oleamide	11.7918
oleic acid	7.94646
O-Phosphoethanolamine	10.3352
O-Phospho-L-serine	8.65615
ornithine	6.95884
Orotate	12.2608
o-Toluic acid	5.82629
Oxalate	10.69
Oxoadipate	12.8943
Oxoproline	20.902
Paeonol	16.6244
Palatinose	13.7996
palmitic acid	15.3663
palmitoleic acid	13.3478
Palmitoleic acid	11.7412
Pantothenate	13.1431
pelargonic acid	11.8387
Pentadecanoic acid	5.45438
pentitol	14.9539
phenylacetamide	17.599
phenylalanine	9.6454
Phenylalanine	7.01875
phosphate	6.04887
phosphate	3.43094
phosphoenolpyruvate	12.71
phosphoethanolamine	7.74959
Phosphonoacetate	3.1212
Phosphoric acid	15.8696
Phosphorylcholine	12.5837
Phosphoserine	19.1875
Phthalic acid	9.74301
P-Hydroxyphenylacetic acid	8.24818
phytanic acid	15.5197
Phytol	7.35199
piceatannol	25.7035
Picolinic acid	37.1976
pinitol	4.18836
pipecolic acid	18.3606
Podophyllotoxin	9.41385
Proline	4.66062
Proline	4.70582
Purine	4.63443
Putrescine	13.2199
pyridoxal-5-phosphate	13.064
Pyridoxine	7.44931
Pyrocatechol	22.5137
Pyroglutamate	19.98
Pyrophosphoric acid	4.27405
Quinolinate	12.8344
rac-Glycerol 3-phosphoate	10.2707
resveratrol	13.977
Rhamnose	14.1027
ribose	8.03233
ribose-5-phosphate	8.50719
Saccharate	7.40836
Sakuranetin	8.67489
salicylaldehyde	6.42421
salicylic acid	3.2059
Sarcosine	14.1892
Sebacate	13.0604
Selenocystamine	16.2518
serine	15.4621
Serotonin	13.3059
Sorbate	29.8469
Sorbose_Rt_10.107_Mass_73.0468	9.57058
Spermidine	16.1963
Spermine	10.1337
squalene	17.8207
stearic acid	15.3313
Stearic acid	10.8035
stigmasterol	10.7023
Suberic acid	3.72238
Succinic acid	6.66855
Tagatose	9.71509
Tartarate	6.73128
tartaric acid	4.41081
taurine	37.6593
tetracosane	10.9976
threonic acid	6.69054
threonine	6.30028
Thymidine-monophosphate	18.4224
Thymine	17.3249
tocopherol delta	15.4069
tranexamic acid	11.0438
trans-4-Hydroxyl-L-Proline	12.5003
Trehalose	14.1341
Tryptamine	17.4779
Tryptophan	6.76409
Tyramine	22.623
Tyrosine	8.37194
Tyrosine	21.8688
UDP GlcNAc	5.96029
Uracil	3.38882
Ureidopropionate	5.5448
Uric Acid	10.6631
Xylitol	6.65827

## Sheet: Baboon liver_QC
Metabolite name	CV%
(-)-Shikimic acid	12.0444
(+-)-alpha-Tocopherol	10.9962
(R)-(-)-Phenylephrine	17.5667
1,2-anhydro-myo-inositol	13.7293
1,3-Diaminopropane	12.8499
1,3-dihydroxypyridine	8.56739
1,5-Anhydeo glucitol	11.927
1,5-Anhydro-D-glucitol	19.6478
1,6-Anhydro-beta-D-glucose	10.9441
16-Hydroxyhexadecanoic acid	11.0617
1-Aminocyclopropane-1-carboxylic acid	9.26638
1-Hexadecanol	10.0555
1-Hexadecanol	14.135
1-Methyladenosine	23.8672
1-methylgalactose	13.7327
1-Methylhistamine	2.55433
1-monoolein	8.70913
2-(1-methyl-2-pyrrolidinyl)-pyridine	25.428
2,3-Diaminopropionate	18.1963
2,3-Dihydroxybenzoic acid	18.3281
2-Coumaric acid	17.9767
2-Coumaric acid	13.0913
2'-Deoxyadenosine	6.17748
2-Deoxy-D-Glucose	18.6655
2-deoxyerythritol	20.1421
2'-Deoxyinosine	11.3464
2'-Deoxyinosine 5'-monophosphate	7.54435
2'-Deoxyuridine	9.67372
2-Hydroxyphenylacetate	11.7369
2-Hydroxyphenylacetic acid	9.01536
2-hydroxypyrazinyl-2-propenoic acid ethyl ester	14.6898
2-Methylglutaric acid	11.0167
2-Methylpropanal	20.204
2-monoolein	10.3158
2-monopalmitin	9.10179
2-Oxoglutarate	20.4165
2-Phosphoglycerate	16.0515
2-Picolinate	12.6697
2-picolinic acid	17.9938
3,4-Dihydroxymandelic acid	16.4053
3,4-Dihydroxyphenylacetic acid	14.4798
3,4-Dihydroxyphenylglycol	30.87
3-aminoisobutyric acid	13.393
3-arylcarbonyl-alanine	11.3524
3-Hydroxybenzoate	2.96804
3-Hydroxybenzylalcohol	17.9779
3-Hydroxyisovaleric acid	17.6554
3-Hydroxymethylglutaryl CoA	14.0719
3-hydroxypalmitic acid	19.1287
3-Hydroxyphenylacetate	11.1996
3-hydroxyphenylacetic acid	12.3818
3-Indoleacetonitrile	16.374
3-Methoxytyramine	3.56856
3-Methoxytyrosine	22.015
3-Methyladenine	20.6957
3-Methyladenine	8.9964
3-Nitro-L-Tyrosine	10.7437
3-phosphoglycerate	23.3755
4-aminobutyric acid minor	19.5626
4-hydroxybenzoate	13.152
4-Hydroxybenzyl alcohol	10.2556
4-Hydroxyphenylacetic acid	11.5434
4-Hydroxypyridine	11.1547
4-Methylumbelliferone	27.7528
5-Aminolevulinic acid	1.45396
5-Aminopentanoic acid	5.2691
5-Aminovaleric acid	5.49304
5-Dehydroquinic acid	22.4706
6-Aminohexanoic acid	12.9095
6-Carboxyhexanoate	11.0135
6-deoxyglucitol	17.2317
6-deoxyglucitol	32.7761
6-Hydroxydopamine	3.67524
Aconitic acid	15.3668
Adenosine	3.2144
Adipate	17.3085
Allothreonine	18.7982
alpha-Lactose	16.4909
Amantadine	6.93882
Anthranilic acid	12.6283
Arabitol	17.1496
arachidonic acid	11.35
asparagine	13.8496
aspartic acid	17.9007
Azelate	10.1459
Benzoate	35.6679
beta alanine	11.7233
beta-Cyano-L-Alanine	5.06133
beta-glycerolphosphate	18.325
beta-hydroxymyristic acid	23.5804
Betaine	11.6074
beta-Ketoadipic acid	14.7422
beta-sitosterol	22.7429
Biotin	8.57017
Cadaverine	2.64896
Cadaverine	3.43455
Caffeine	0.0898092
caprylic acid	18.6006
Catechol	15.1845
Cellobiose	19.9518
cholesterol	7.68273
cis-Aconitic acid	8.75752
cis-gondoic acid	21.5468
Citramalate	19.5465
conduritol-beta-epoxide	16.4851
Creatinine	16.7735
cyclohexylamine	28.1262
Cyclopentanone	12.6766
Cysteamine	6.68281
Cysteamine	13.5707
Cysteine	7.10038
cysteine-glycine	23.1591
Cystine	17.8769
Cytidine monophosphate	13.3777
D-(-)-Penicillamine	11.005
D-(+)-Allose	1.51401
D-(+)-Galactosamine	13.9335
D-(+)-Galactose	8.57246
D-(+)-Glucosamine	21.437
D-(+)-Mannose	12.209
D-(+)-Xylose	20.2204
D,L-alpha,epsilon-Diaminopimelic acid	18.2004
D-Alanine	8.49199
D-Arabinose 5-phosphate	23.8006
Dehydroisoandrosterone-3-sulfate	7.8413
Deoxycytidine	7.17788
Deoxyguanosine	21.6588
Deoxyribose	54.6857
D-Fructose 6-phosphate	11.1221
Dihydroorotate	11.0956
Dihydrouracil	21.8464
Dihydroxyacetone	6.97064
DL-2,3-Diaminopropionic acid	11.5244
DL-3,4-Dihydroxymandelic acid	17.7088
DL-4-Hydroxy-3-methoxymandelic acid	10.9088
DL-6,8-Thioctic acid	10.3313
DL-beta-Hydroxybutyric acid	8.73606
DL-Dihydrolipoic acid	8.01147
DL-Ethionine	4.47876
DL-Threo-beta-HydroxyAspartic acid	21.6484
DL-threo-beta-Methylaspartic acid	12.1421
docosahexaenoic acid	16.0743
docosenoic acid	13.4489
Dopamine	4.6698
D-Ornithine	16.0064
D-Panose	9.59019
D-Ribose 5-phosphate	5.81234
D-Ribulose 1,5-diphosphate	5.86564
D-Ribulose-5-phosphate	5.06644
D-Sorbitol 6-phosphate	30.3061
D-Threitol	14.3837
D-Xylulose	12.2116
Elaidic acid	13.1723
epicatechin	31.3733
epsilon-caprolactam	20.8498
Erythritol	59.8484
erythronic acid lactone	12.9708
ethanolamine	39.904
Ethyl-3-Ureidopropionate	54.7146
Ethylmalonate	17.4548
formononetin	21.9731
fructose-1-phosphate	19.6698
Fructose-6-phosphate	13.9461
Fucose	11.0138
Fumarate	13.6809
GABA	17.5316
Galactarate	28.5944
Galactitol	16.4829
galactose-6-phosphate	4.09312
Galacturnonate	16.4781
Gallic acid	15.0204
gamma-Linolenic acid	18.5526
Gentisic acid	12.1881
gluconic acid lactone	7.07212
Gluconolactone	13.7504
Glucosaminate	16.6801
glucosamine	13.4509
glucose	21.8757
Glucose-1-phosphate	6.1637
Glucose-6-phosphate	4.27467
glutamic acid	10.5339
Glutamine	4.62953
Glutarate	19.3097
Glutarylcarnitine	23.8425
Glycerate	3.08897
Glycerol-3-phosphate	19.2154
glycerol-alpha-phosphate	14.2497
Glycine	10.7774
Gly-Gly	13.0419
Harmaline	18.6729
Heptadecanoic acid	14.5957
hexoside	20.8234
Histamine	3.93982
Homocysteine	11.0138
Homogentisate	14.7313
Homoserine	5.4082
Homoserine lactone	13.0389
Homovanillic acid	11.6215
hydrocinnamic acid	10.9807
HydroxyButyric acid	7.8545
Hypoxanthine	13.3031
Ibuprofen	11.1996
Indole-3-Acetaldehyde	13.4454
Indoxyl sulfate	8.77636
inosine	3.9608
inosine-5'-monophosphate	3.41729
isocitric acid	10.9127
Isoleucine	26.2883
isopentadecanoic acid	19.5931
Isopentenyladenosine	12.284
isothreonic acid	5.1755
Ketoisoleucine	15.44
kynurenine 2TMS	26.616
L-(-)-Threonine	22.6031
L-(+)-Lysine	5.79166
L-2-Aminobutyric acid	13.5744
L-5-Oxoproline	22.2248
Lactose	11.9977
L-Alanine	2.45856
L-Asparagine	10.2061
Lauric acid	15.4148
Lauroylcarnitine	15.9775
Leucine	12.7506
levoglucosan	14.6296
L-Glutamic acid	24.5814
L-Glutamine	27.8635
L-Gulonolactone	14.4808
L-Histidinol	18.3013
L-Iditol	15.504
Linoleic acid	11.3481
Linolenic acid	10.116
lithocholic acid	4.3374
L-Methionine	4.65811
L-Methionine sulfone	21.9482
L-Serine	19.1324
L-Theanine	14.077
L-Valine	23.2238
Lysine	9.18963
Malate	15.2131
malic acid	18.3981
Malonate	23.6807
Maltose	1.57595
Maltotriose	11.4188
mannose-6-phosphate	7.71498
Melibiose	10.0842
Menaquinone	20.9105
Mesaconic acid	25.6331
meso-Erythritol	17.2622
Meso-tartarate	16.4384
Methyl jasmonic acid	14.2654
Methyl-4-aminobutyrate	15.5121
Methylglutarate	19.7823
methylhexose	17.7004
Methylmalonate	9.67777
methyltetrahydrophenanthrenone	13.2632
Mevalonate	16.557
monomyristin	25.3496
Myoinositol	16.4851
Myricetin	7.82607
Myristic acid methyl ester	7.70348
myristyl myristate	7.48236
N,N-Dimethylarginine	13.9711
N-Acetyl glutamine	12.1791
N-Acetylaspartate	18.8822
N-acetylaspartic acid	23.6707
N-Acetyl-D-glucosamine	18.7681
N-Acetyl-D-glucosamine 6-phosphate	10.2833
N-Acetyl-DL-serine	20.9901
N-acetyl-D-mannosamine	17.1691
N-Acetylleucine	16.7297
N-Acetyl-L-glutamine	23.5359
N-acetylmannosamine	9.1675
N-Acetylmethionine	11.4356
N-Acetylneuraminic acid	7.2129
N-acetylornithine	8.06924
N-Acetylputrescine	6.04571
N-acetylputrescine	2.42113
N-alpha-Acetyl-L-Lysine	6.90645
N-alpha-Acetyl-L-ornithine	2.53777
N-Alpha-AcetylLysine	4.18286
naproxen	16.0022
N-FormylGlycine	17.8302
N-Formyl-L-Methionine	6.07348
Nicotinamide	29.7552
N-Methylaspartate	20.3905
Nonadecanoic acid methyl ester	12.1907
Noradrenaline	2.70271
Normetanephrine	4.29091
Norvaline	16.5163
O-Acetylserine	21.3499
octadecylglycerol	16.1024
oleamide	16.5526
Oleic acid	16.2668
O-Phosphoethanolamine	19.5301
O-Phospho-L-serine; GC-EI-TOF; MS; x TMS; BP	7.22639
Orotate	5.56704
o-Toluic acid	10.0498
Oxoadipate	13.9976
Oxoproline	19.5782
Paeonol	20.1006
Palatinose	15.6011
palmitic acid	21.6588
Palmitoleic acid	8.59665
pelargonic acid	25.7865
pentadecanoic acid	15.4264
pentitol	18.1821
Phenylalanine	10.4505
Phosphate	17.2085
Phosphoenolpyruvic acid	9.95569
phosphoethanolamine	8.02456
Phosphorylcholine	21.9365
Phosphoserine	20.9564
Phthalic acid	9.49693
p-Hydroxybenzaldehyde	13.0178
P-Hydroxyphenylacetic acid	11.1194
piceatannol	10.7144
Pimelic acid	11.7331
Pipecolate	2.04073
P-Octopamine	3.03278
Purine	23.6176
Putrescine	11.3107
Pylloquinone	5.68746
Pyridoxamine	#DIV/0!
Pyridoxine	10.1356
Pyrocatechol	17.0529
Pyroglutamate	19.9841
Pyrophosphoric acid	13.2805
Quinic acid	6.15089
R-(-)-1-Amino-2-propanol	19.5052
Raffinose	6.87153
Rhamnose	14.1277
ribose	18.5612
ribose-5-phosphate	14.8301
Saccharate	10.8125
S-Adenosyl-L-methionine	20.0185
Salicyl alcohol-beta-glucoside	5.39986
Sarcosine	28.0369
Sebacate	13.5591
Serotonin	2.53777
Sorbate	43.9866
Sorbitol	5.651
Sorbose	16.4575
Spermidine	2.9915
Stearic acid	11.3541
stigmasterol	13.387
Suberic acid	12.5268
Succinic acid	14.6382
Sucrose	9.71199
Tagatose	4.55774
Tartarate	4.74193
tetracosane	13.5238
tranexamic acid	18.5217
trans-4-Hydroxy-L-proline	15.3122
Trans-Aconitate	18.9243
trans-Chalcone	17.9553
Trehalose	14.6155
Tryptamine	2.55222
Tryptophan	13.4454
Tyramine	2.94607
Tyrosine	20.003
UDP GlcNAc	7.4577
UDP-N-acetylglucosamine	10.8316
Urea	23.2337
Ureidopropionate	23.3765
Uric acid	21.5187
Uridine	10.2833
Uridine 5'-diphospho-N-acetylglucosamine	15.8456
Urocanic acid	8.44801
Xanthine	20.9172
xylitol	18.2207
z phthalate	9.47245
zymosterol	10.7895

## Sheet: Data pre-processing parameters
MS-DIAL ver. 4.60
#Data type
Data type	Centroid
Ion mode	Positive
Accuracy type	IsAccurate
#Data collection parameters
Retention time begin	0
Retention time end	25
Mass range begin	20
Mass range end	800
#Data processing
Number of threads	1
#Peak detection parameters
Smoothing method	LinearWeightedMovingAverage
Smoothing level	3
Average peak width	20
Minimum peak height	1000
Mass slice width	0.01
Mass accuracy	0.01
#MS1Dec parameters
Sigma window value	0.05
Amplitude cut off	1
#identification
MSP file	Z:\final\Metabolomics\SPECTRAL_LIBRARIES\CPM_AMPONG_OLIVIER_WAKE_ORBITRAP__GC_EI_MS_LIBRARY.msp
RI index file	see last
Retention type	RT
RI compound	Alkanes
Retention time tolerance	0.5
Retention index tolerance	20
EI similarity library tolerance	60
Identification score cut off	60
Use retention information for scoring	TRUE
Use retention information for filtering	TRUE
Use quant masses defined in MSP format file	TRUE
#Alignment parameters setting
Reference file	Z:\final\Metabolomics\Isaac_Nist_plasma_MzML\150nist plasma(imputation study)\QC1.mzML
Retention time	RT
Retention index tolerance	20
Retention time tolerance	0.1
EI similarity tolerance	60
Retention time factor	0.5
EI similarity factor	0.5
Identification after alignment	FALSE
Gap filling by compulsion	FALSE
Basepeak mz selected as the representative quant mass	FALSE
#Filtering setting
Peak count filter	0
N% detected in at least one group	0
Remove feature based on peak height fold-change	FALSE
Sample max / blank average	5
Sample average / blank average	5
Keep identified and annotated metabolites	TRUE
Keep removable features and assign the tag for checking	TRUE
